# Supplementary material
Source: PubMed Central journal article supplement (PMC5503474)
Supplement: NIHMS874010-supplement-1.pdf [file NIHMS874010-supplement-1.pdf]

# Supplementary figure 1

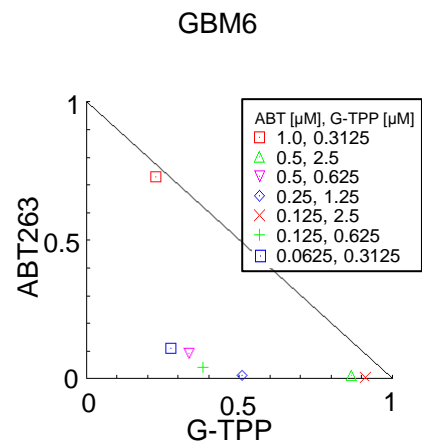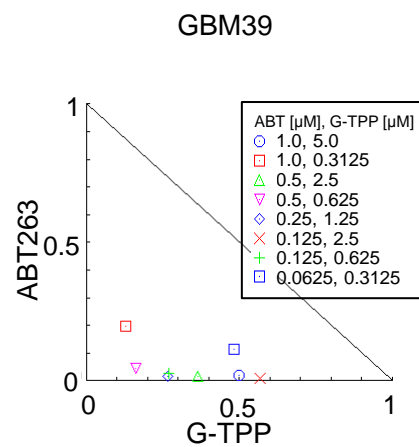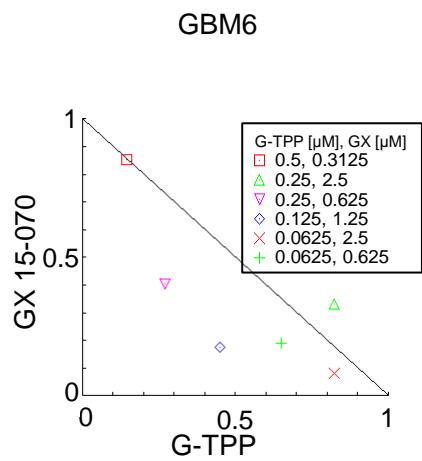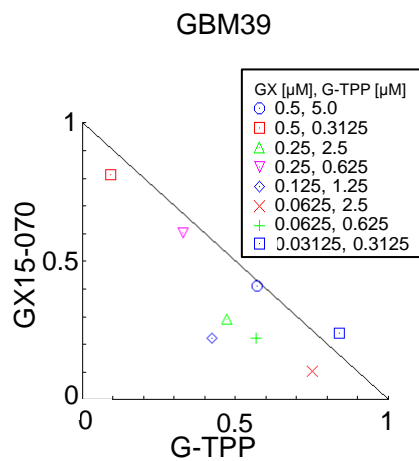

# Supplementary figure 2

A

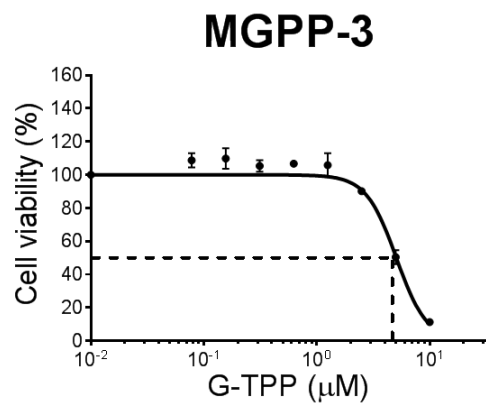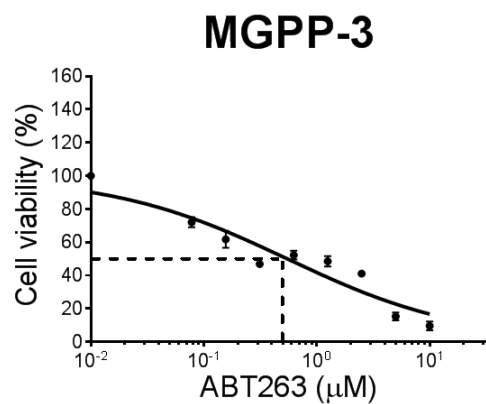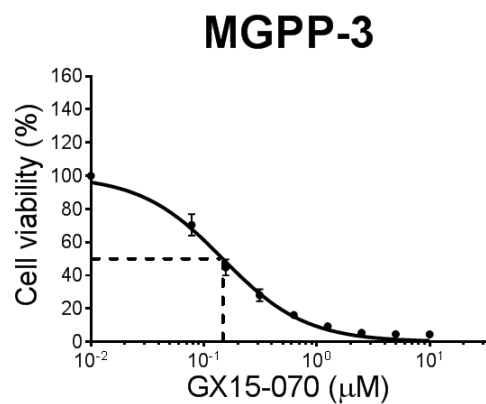

B

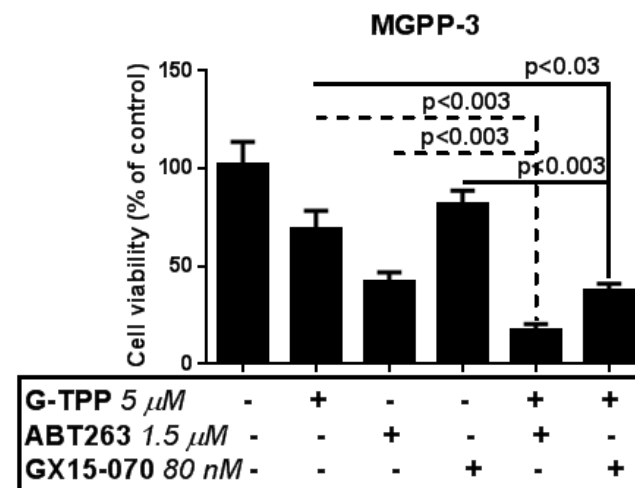

C

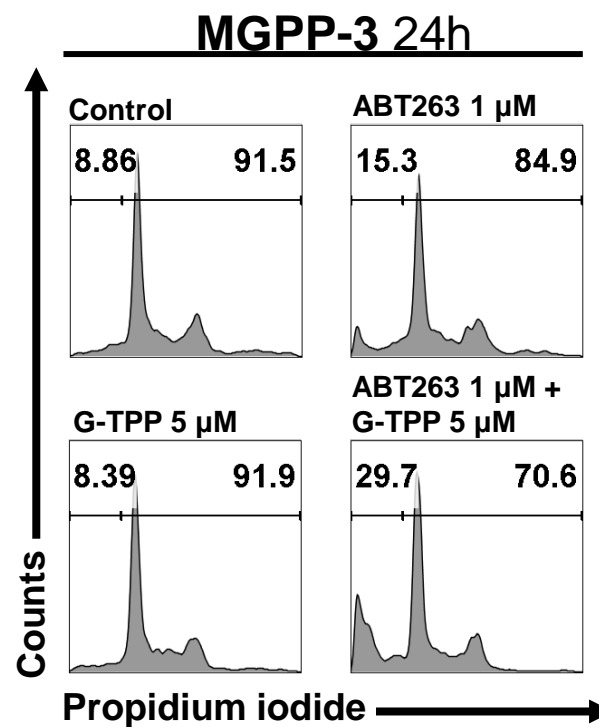

# Supplementary figure 3

A

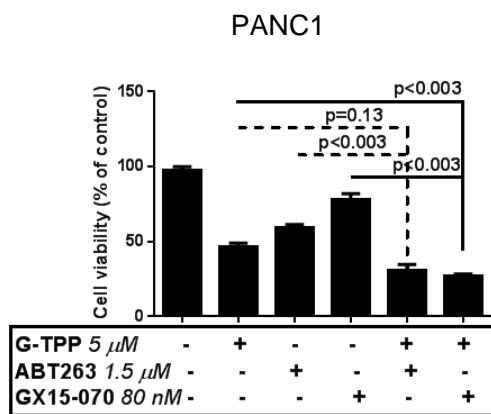

B

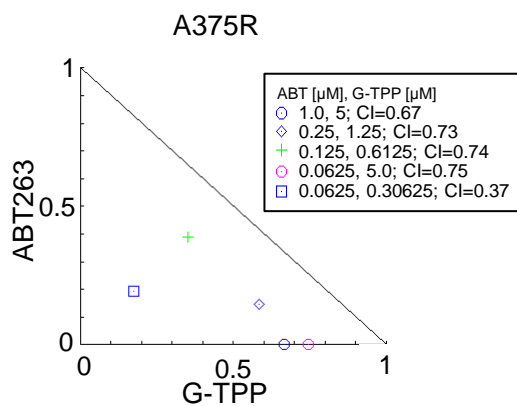

C

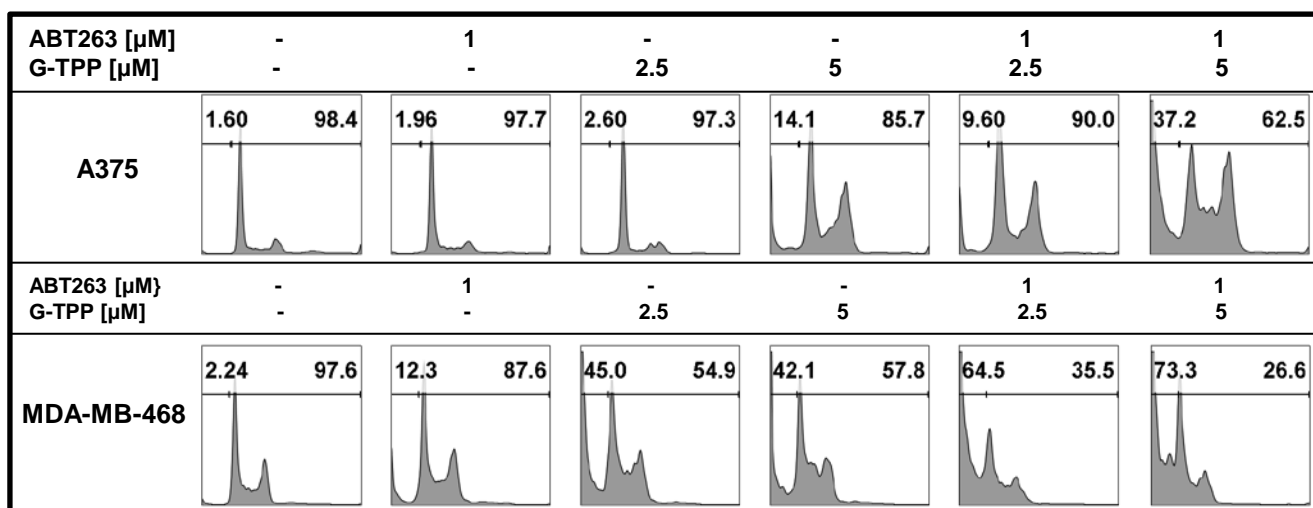

D

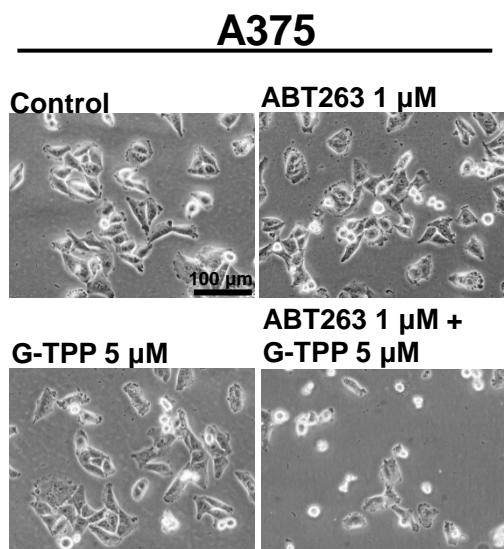

E

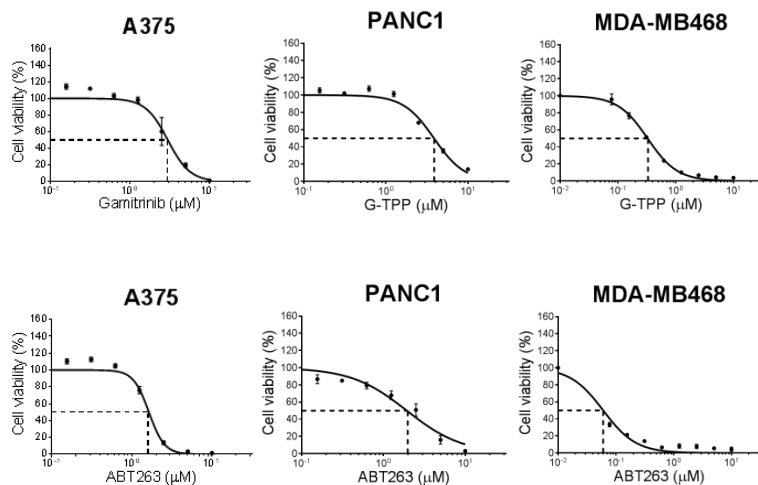

# Supplementary figure 4

A

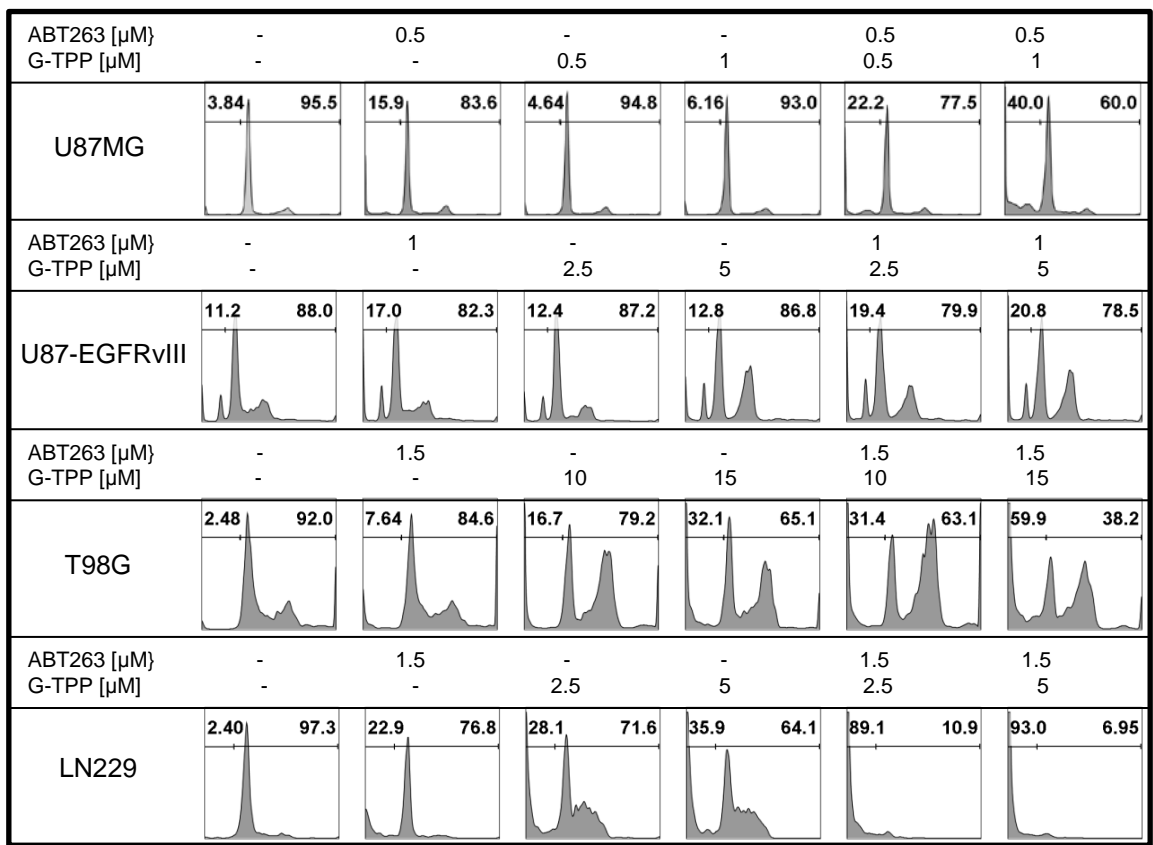

B

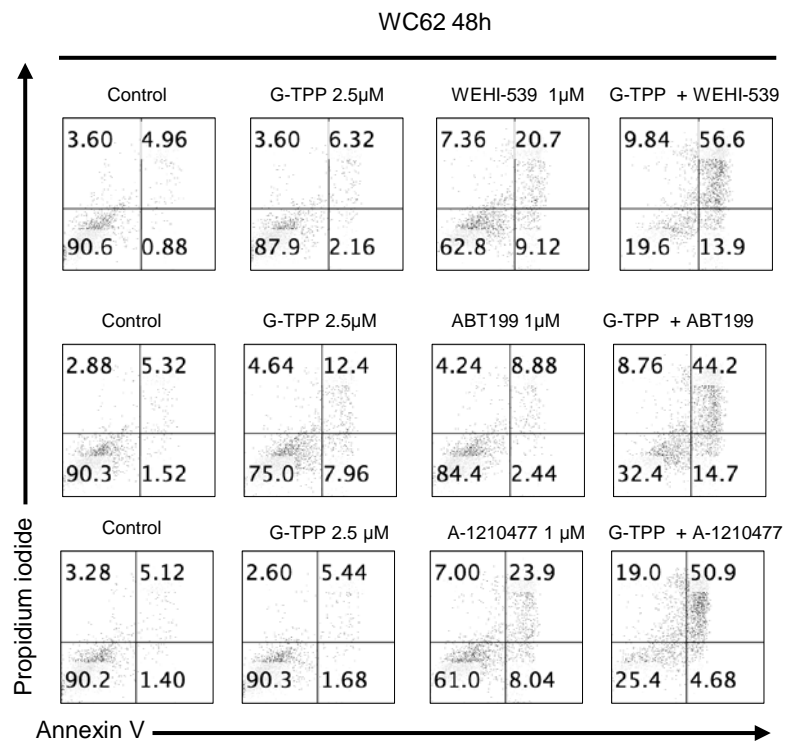

# Supplementary figure 5

**A**

NCH644 48h

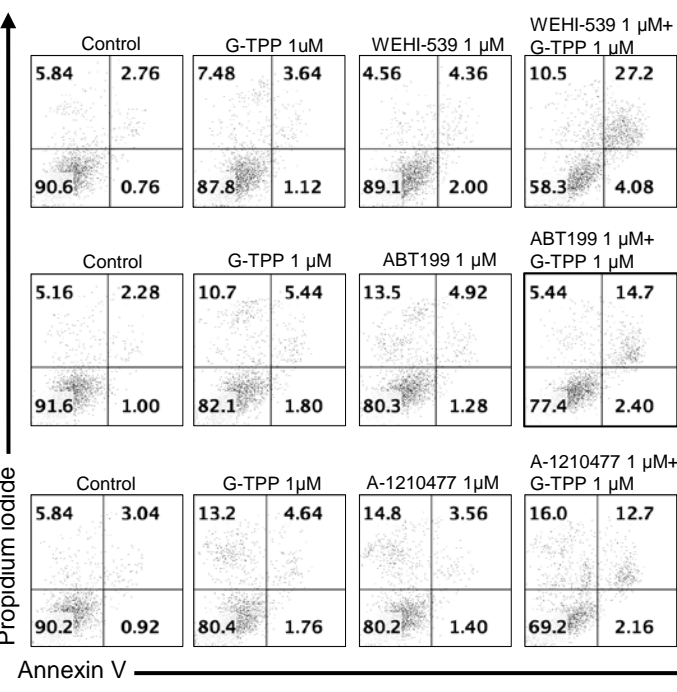

**B**

U87 48h

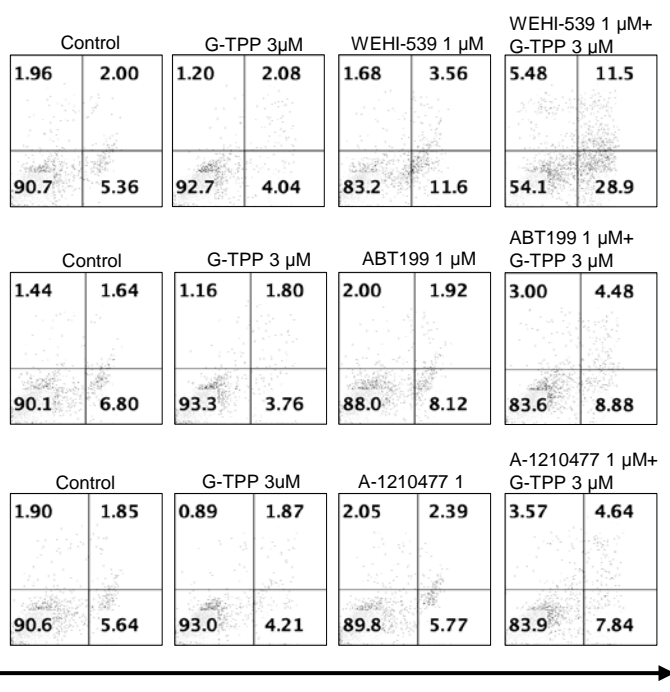

**C**

T98G 48h

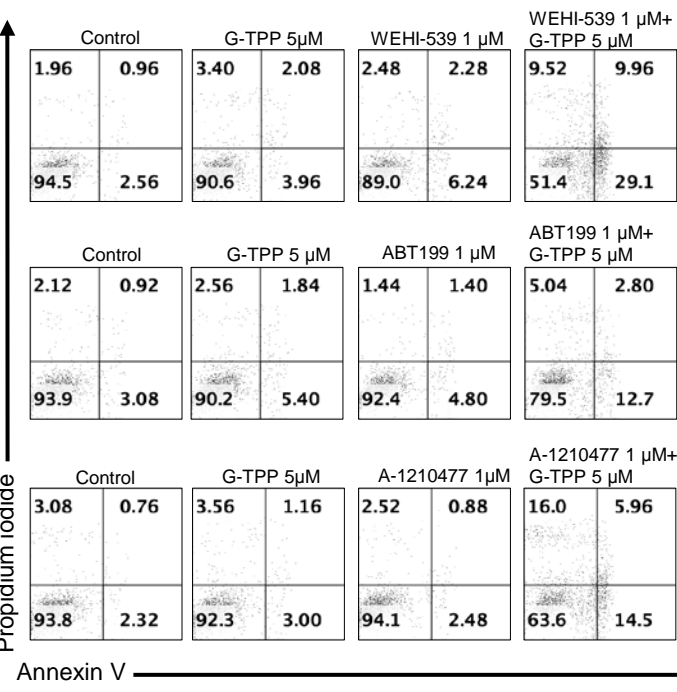

**D**

LN229 48h

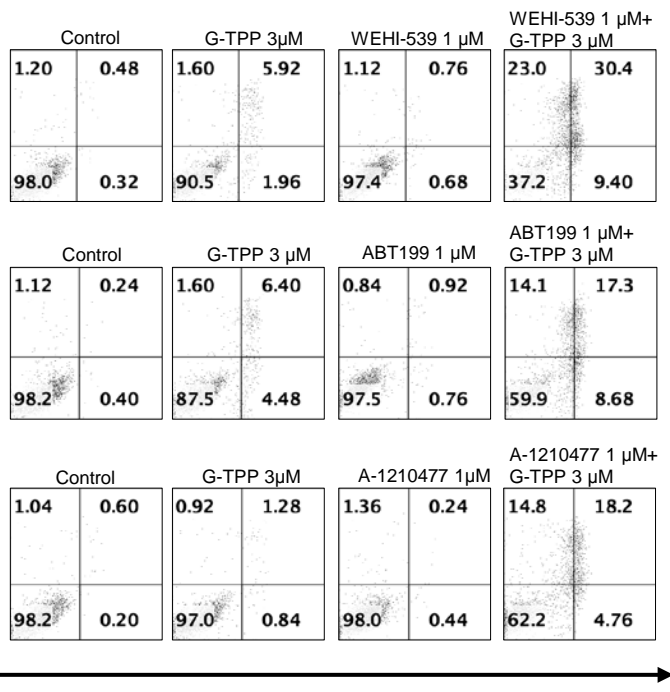

# Supplementary figure 6

**A**

WC62 48h

**B**

Mewo 48h

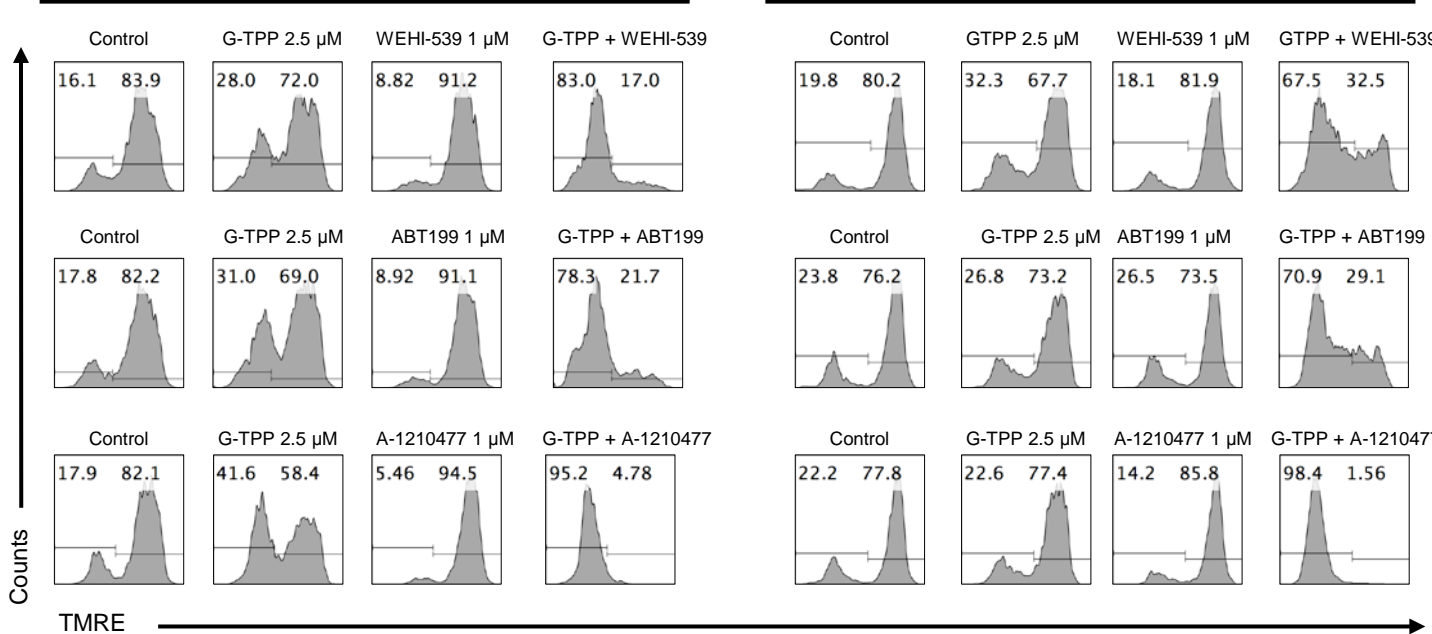

**C**

T98G 48h

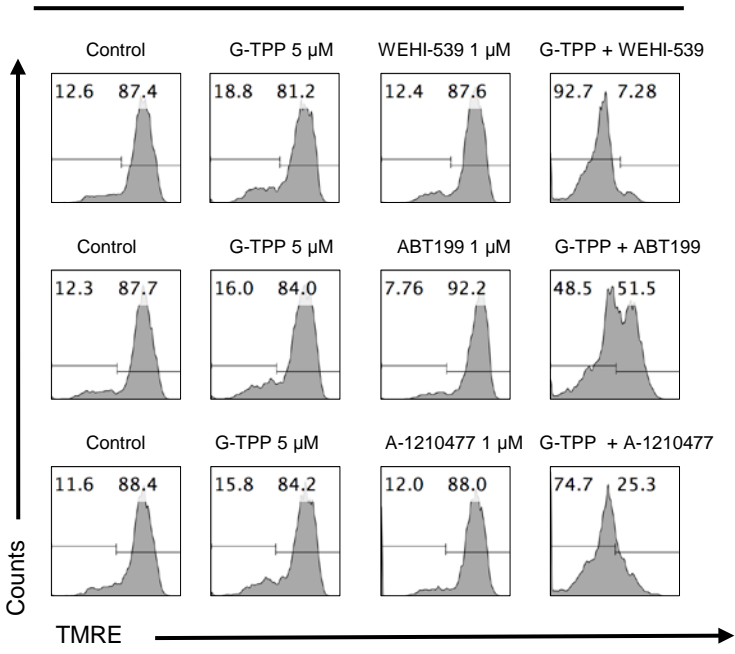

# Supplementary figure 7

A

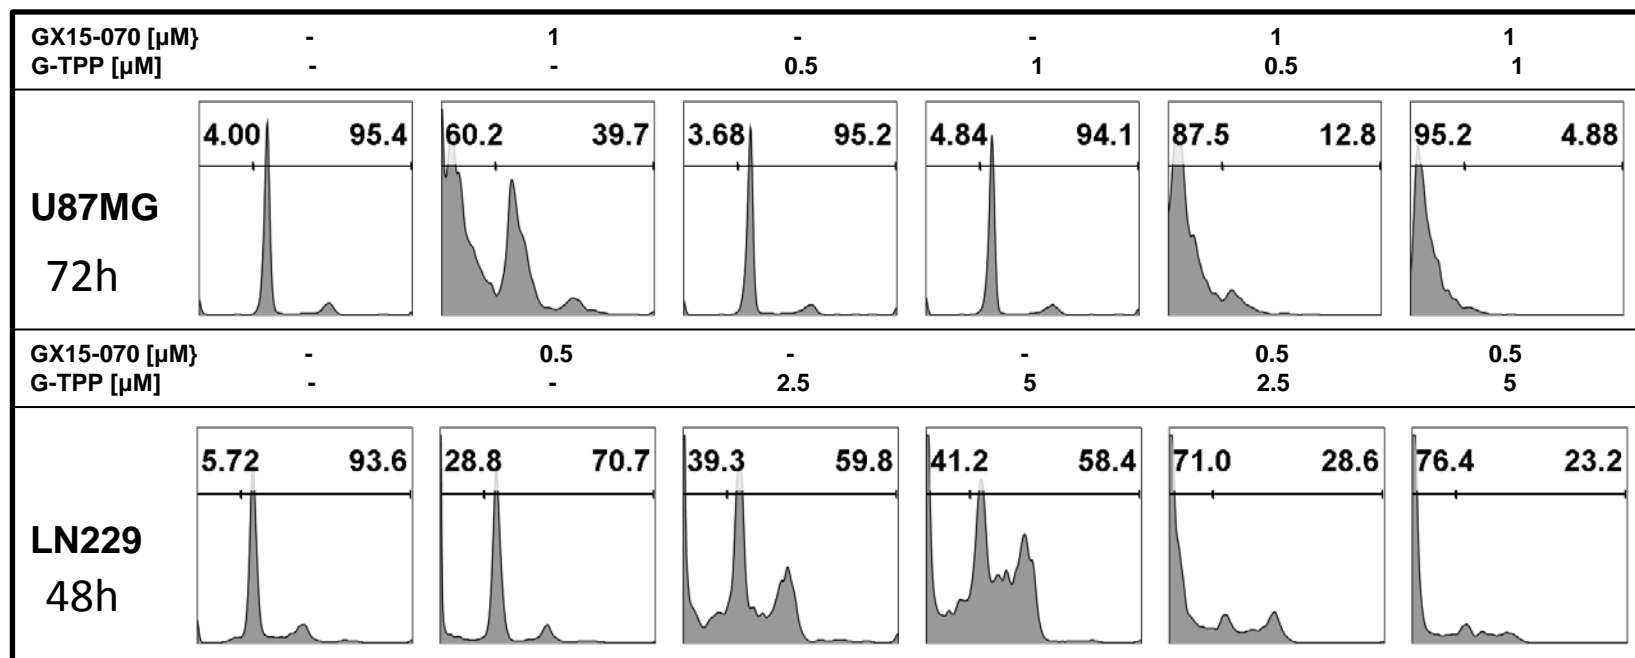

B

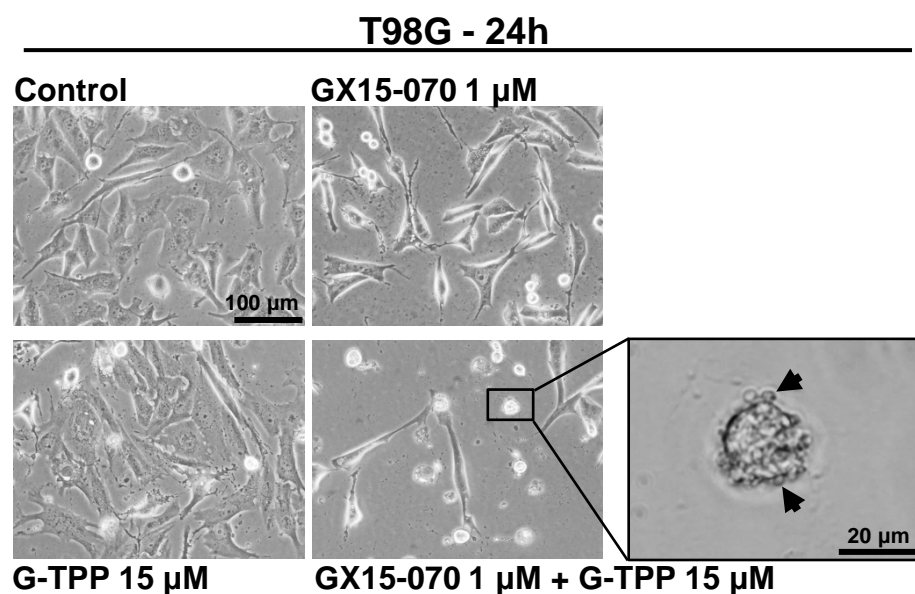

C

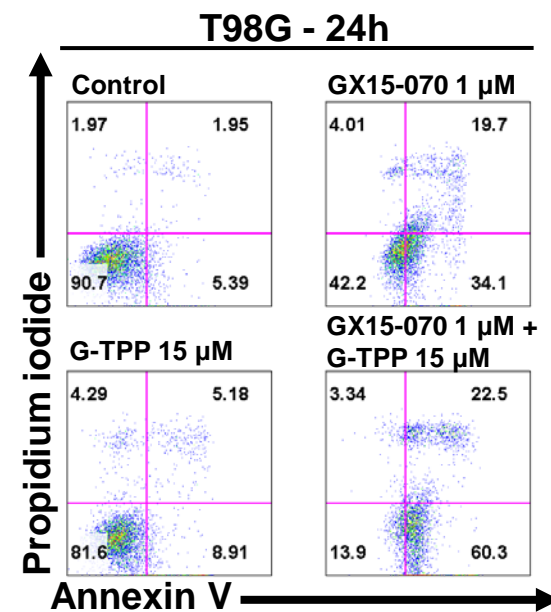

# Supplementary figure 8

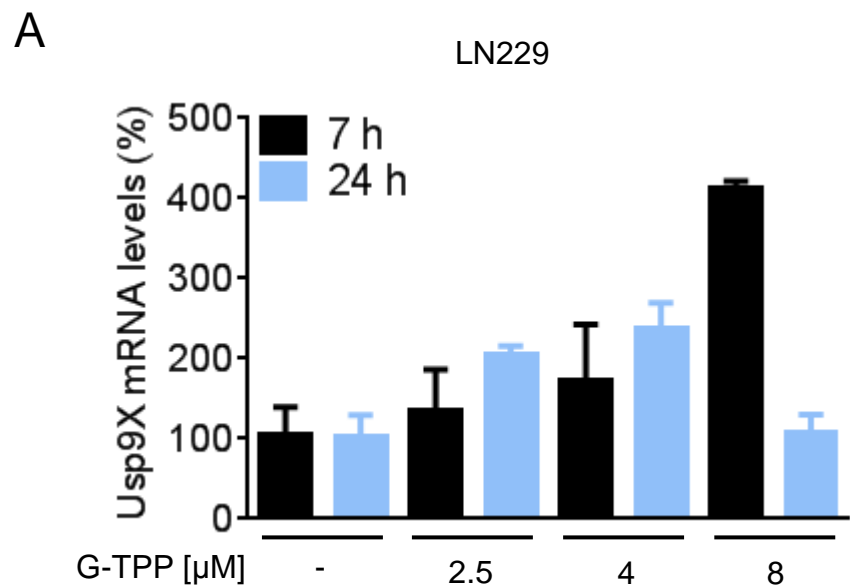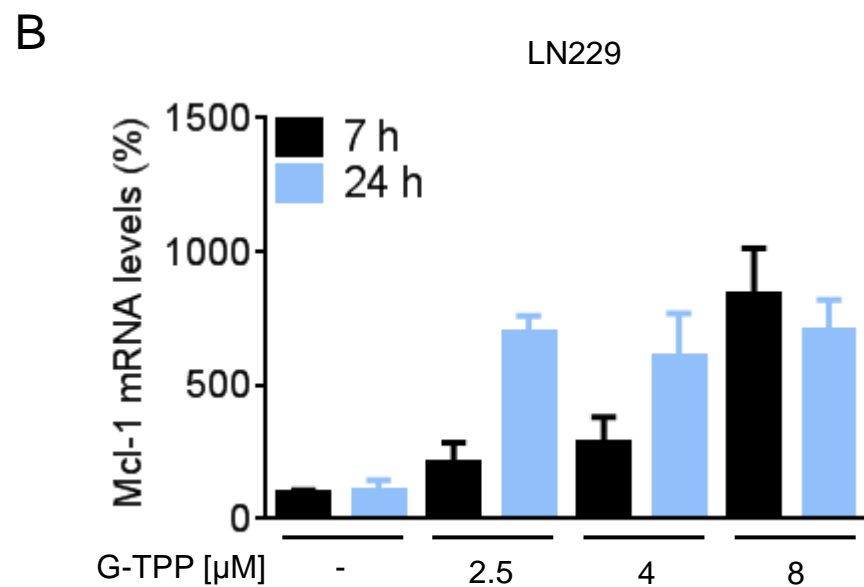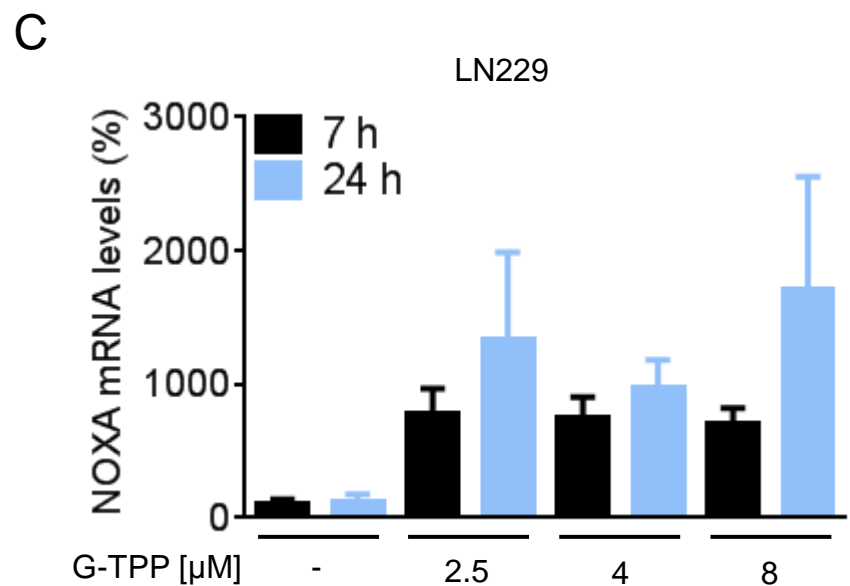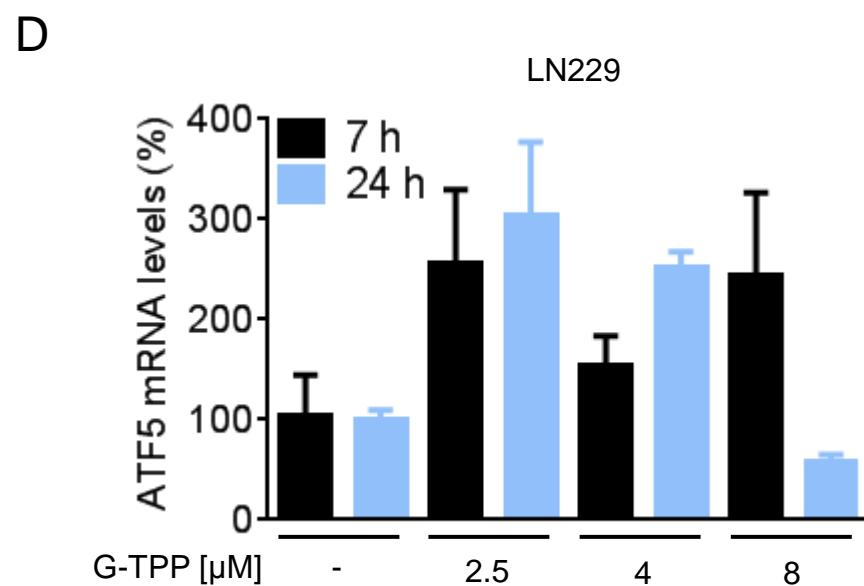



# Supplementary figure 9

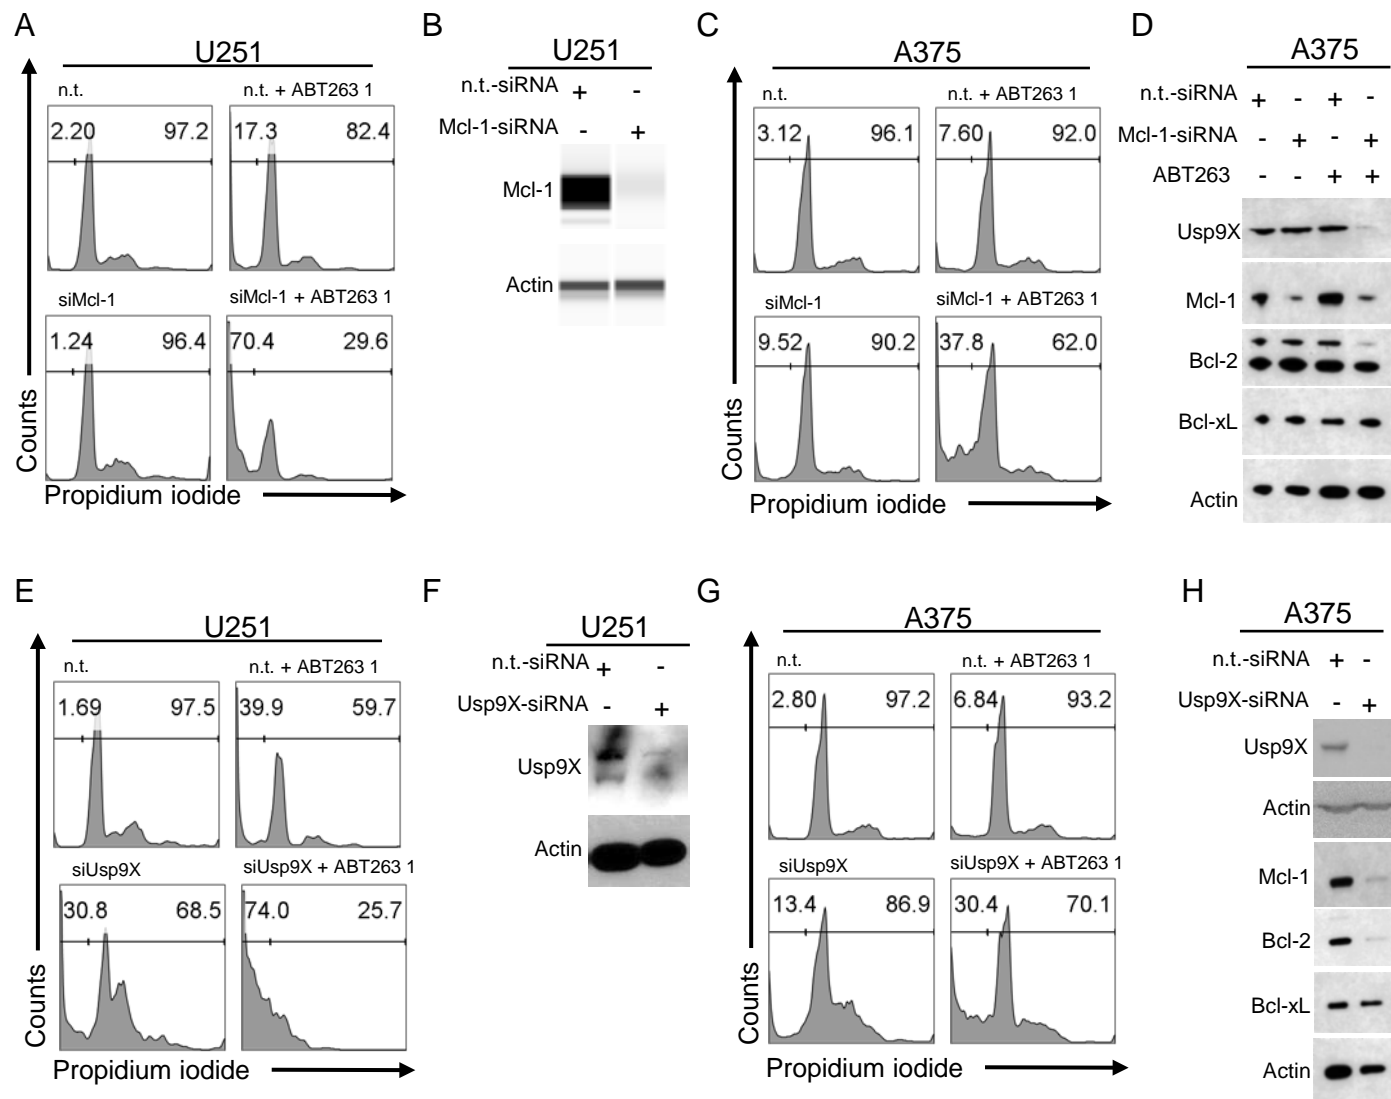

# Supplementary figure 10

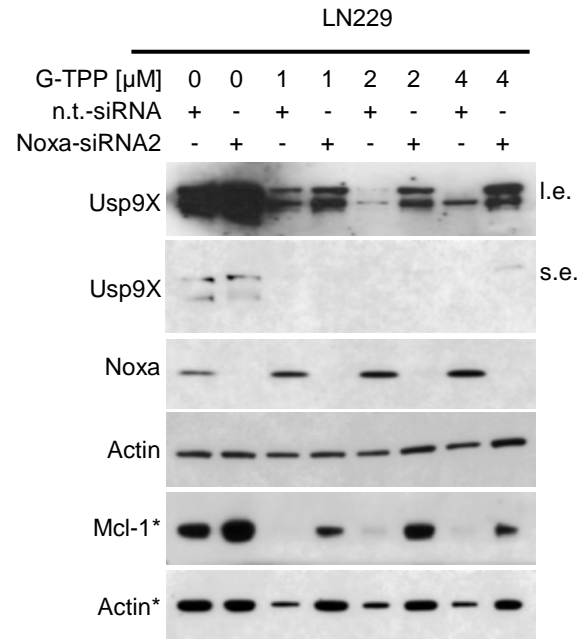

# Supplementary figure 11

A

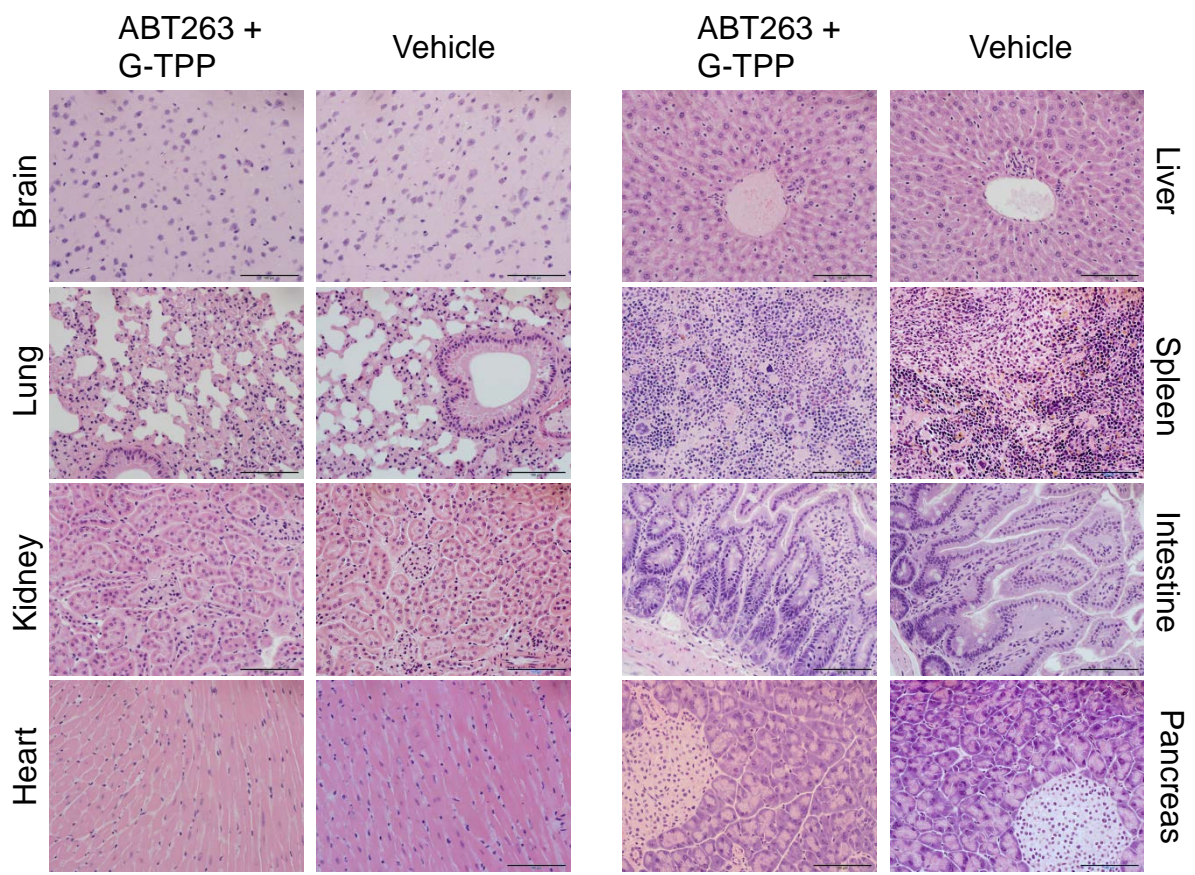

B

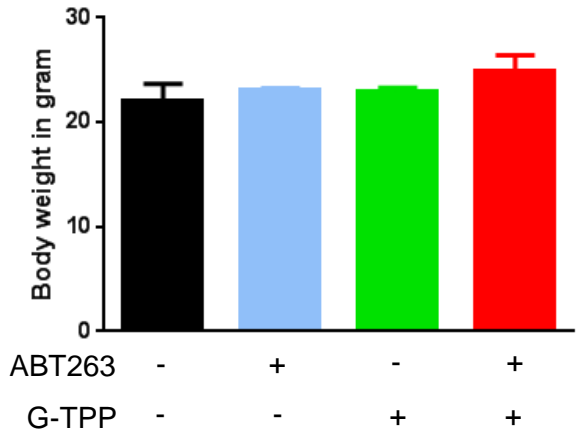

### MDA-MB-231

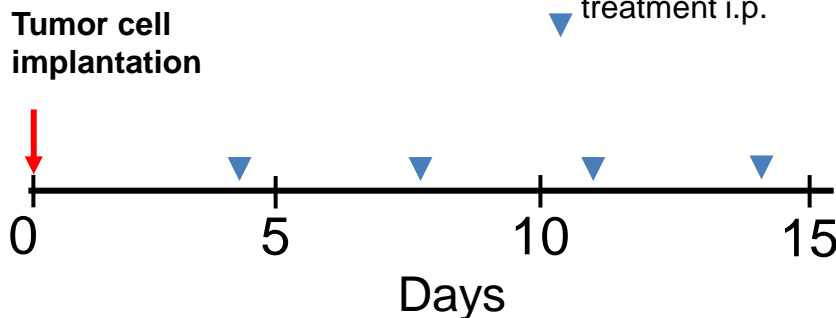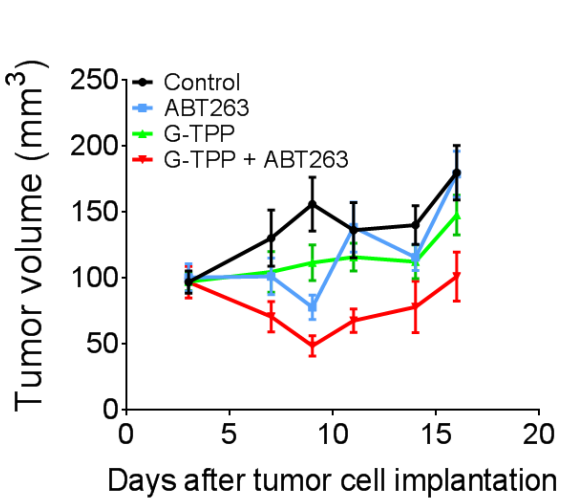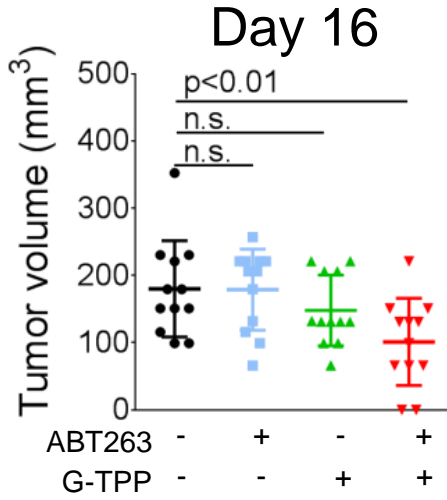

Supplementary table 1

| Cell line    | Treatment |      |
|--------------|-----------|------|
|              | A         | GX   |
| U87MG        | 246.88    | 9.52 |
| U87-EGFRvIII | 1.03      | 1.49 |
| LN229        | 2.24      | 1.59 |
| T98G         | 4.13      | 2.40 |
| GS9-6        | 1.43      | 1.81 |
| NCH644       | 2.06      | 1.21 |
| MGPP-3       | 1.15      | 1.43 |
| A375         | 1.64      | 1.47 |
| PANC1        | 0.95      | 1.15 |
| MDA-MB468    | 1.11      | 1.37 |

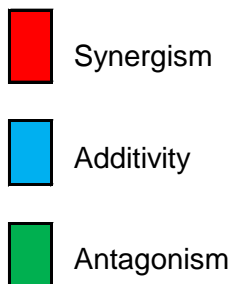

Supplementary table 2

| U251                    |                          |         |                         |                            |         |
|-------------------------|--------------------------|---------|-------------------------|----------------------------|---------|
| G-TPP ( $\mu\text{M}$ ) | ABT263 ( $\mu\text{M}$ ) | CI      | G-TPP ( $\mu\text{M}$ ) | GX15-070 ( $\mu\text{M}$ ) | CI      |
| 5.0                     | 2.0                      | 0.347   | 5.0                     | 2.0                        | 0.17991 |
| 5.0                     | 0.25                     | 0.18451 | 5.0                     | 0.25                       | 0.27677 |
| 2.5                     | 1.0                      | 0.81536 | 2.5                     | 1.0                        | 0.2279  |
| 2.5                     | 0.5                      | 0.76948 | 2.5                     | 0.5                        | 0.31255 |
| 1.25                    | 1.0                      | 2.2151  | 1.25                    | 1.0                        | 0.1954  |
| 1.25                    | 0.5                      | 1.80157 | 1.25                    | 0.5                        | 0.22098 |
| 0.625                   | 2.0                      | 2.20906 | 0.625                   | 2.0                        | 0.11495 |
| 0.625                   | 0.25                     | 0.55813 | 0.625                   | 0.25                       | 0.17605 |
| 0.3125                  | 0.125                    | 0.67837 | 0.3125                  | 0.125                      | 0.08802 |
| GBM6                    |                          |         |                         |                            |         |
| G-TPP ( $\mu\text{M}$ ) | ABT263 ( $\mu\text{M}$ ) | CI      | G-TPP ( $\mu\text{M}$ ) | GX15-070 ( $\mu\text{M}$ ) | CI      |
| 5.0                     | 1.0                      | 1.71188 | 5.0                     | 0.5                        | 2.2487  |
| 0.3125                  | 1.0                      | 0.95799 | 0.3125                  | 0.5                        | 1.00108 |
| 2.5                     | 0.5                      | 0.88136 | 2.5                     | 0.25                       | 1.15542 |
| 0.625                   | 0.5                      | 0.43087 | 0.625                   | 0.25                       | 0.67522 |
| 1.25                    | 0.25                     | 0.52161 | 1.25                    | 0.125                      | 0.62541 |
| 2.5                     | 0.125                    | 0.91578 | 2.5                     | 0.0625                     | 0.9074  |
| 0.625                   | 0.125                    | 0.42217 | 0.625                   | 0.0625                     | 0.84109 |
| 5.0                     | 0.0625                   | 1.6389  | 5.0                     | 0.03125                    | 1.59338 |
| 0.3125                  | 0.0625                   | 0.38682 | 0.3125                  | 0.03125                    | 4.17293 |
| GBM39                   |                          |         |                         |                            |         |
| G-TPP ( $\mu\text{M}$ ) | ABT263 ( $\mu\text{M}$ ) | CI      | G-TPP ( $\mu\text{M}$ ) | GX15-070 ( $\mu\text{M}$ ) | CI      |
| 5.0                     | 1.0                      | 0.5195  | 5.0                     | 2.0                        | 0.17991 |
| 0.3125                  | 1.0                      | 0.3273  | 5.0                     | 0.5                        | 0.98478 |
| 2.5                     | 0.5                      | 0.38143 | 0.3125                  | 0.5                        | 0.90889 |
| 0.625                   | 0.5                      | 0.20795 | 2.5                     | 0.25                       | 0.7659  |
| 1.25                    | 0.25                     | 0.28244 | 0.625                   | 0.25                       | 0.93136 |
| 2.5                     | 0.125                    | 0.57862 | 1.25                    | 0.125                      | 0.64509 |
| 0.625                   | 0.125                    | 0.29883 | 2.5                     | 0.0625                     | 0.85412 |
| 5.0                     | 0.0625                   | 1.14341 | 0.625                   | 0.0625                     | 0.79034 |
| 0.3125                  | 0.0625                   | 0.59509 | 5.0                     | 0.03125                    | 1.2908  |

Supplementary table 3

|               |             |              |              |
|---------------|-------------|--------------|--------------|
| WC62          | G-TPP       | ABT263       |              |
|               | 5 $\mu$ M   | 2 $\mu$ M    | 0.25 $\mu$ M |
|               |             | 1.021735     | 1.071481     |
|               | 2.5 $\mu$ M | 1 $\mu$ M    | 0.5 $\mu$ M  |
|               |             | 1.307594     | 1.332656     |
| 1.25 $\mu$ M  | 1 $\mu$ M   | 0.5 $\mu$ M  |              |
|               | 1.176776    | 1.392843     |              |
| 0.625 $\mu$ M | 2 $\mu$ M   | 0.25 $\mu$ M |              |
|               | 0.634062    | 0.91945      |              |
| MeWo          | G-TPP       | ABT263       |              |
|               | 5 $\mu$ M   | 2 $\mu$ M    | 0.25 $\mu$ M |
|               |             | 1.030161     | 1.166147     |
|               | 2.5 $\mu$ M | 1 $\mu$ M    | 0.5 $\mu$ M  |
|               |             | 1.273759     | 1.253719     |
| 1.25 $\mu$ M  | 1 $\mu$ M   | 0.5 $\mu$ M  |              |
|               | 2.088662    | 1.417501     |              |
| 0.625 $\mu$ M | 2 $\mu$ M   | 0.25 $\mu$ M |              |
|               | 0.420373    | 1.380496     |              |
| COLO 829      | G-TPP       | ABT263       |              |
|               | 5 $\mu$ M   | 2 $\mu$ M    | 0.25 $\mu$ M |
|               |             | 1.04144      | 1.191881     |
|               | 2.5 $\mu$ M | 1 $\mu$ M    | 0.5 $\mu$ M  |
|               |             | 1.426693     | 1.396713     |
| 1.25 $\mu$ M  | 1 $\mu$ M   | 0.5 $\mu$ M  |              |
|               | 4.13524     | 2.365716     |              |
| 0.625 $\mu$ M | 2 $\mu$ M   | 0.25 $\mu$ M |              |
|               | 0.391232    | 2.971897     |              |

 Synergism  
 Additivity  
 Antagonism

Supplementary table 4

|       | G-TPP     | WEHI-539 |          | ABT199   |          | A1210477 |          |
|-------|-----------|----------|----------|----------|----------|----------|----------|
|       |           | 2 μM     | 0.25 μM  | 2 μM     | 0.25 μM  | 2 μM     | 0.25 μM  |
| U87MG | 3 μM      | 1.405952 | 1.375526 | 1.248727 | 1.13694  | 1.875422 | 1.155369 |
|       | 2 μM      | 1.583901 | 1.31515  | 1.581549 | 1.311516 | 2.095341 | 1.81493  |
|       | 1 μM      | 2.226636 | 1.578128 | 5.310464 | 3.855076 | 9.120088 | 6.370414 |
|       | 0.5 μM    | 1.423747 |          | 2.976018 |          | 17.43553 |          |
|       | G-TPP     | WEHI-539 | ABT199   | A1210477 |          |          |          |
| LN229 | 3 μM      | 1.298462 | 1.232587 | 1.182995 | 1.129091 | 1.153441 | 1.136227 |
|       | 2 μM      | 1.726418 | 1.59144  | 1.244926 | 1.138753 | 1.660021 | 1.593254 |
|       | 1 μM      | 1.599023 | 1.506708 | 1.405921 | 1.262016 | 2.129928 | 1.744952 |
|       | 0.5 μM    | 2.984697 | 1.846975 | 1.575442 | 1.090683 | 3.249599 | 2.486376 |
|       | G-TPP     | WEHI-539 | ABT199   | A1210477 |          |          |          |
| T98G  | 5 μM      | 4.368677 | 1.738517 | 3.125287 | 1.481974 | 4.208588 | 1.111199 |
|       | 2.5 μM    | 2.966042 | 1.827702 | 5.270299 | 1.557315 | 1.823932 | 0.977916 |
|       | 1.25 μM   | 1.791373 | 1.996255 | 0.084368 | 2.781453 | 1.592329 | 1.173322 |
|       | 0.625 μM  | 1.172782 | 0.928309 | 0.49855  | 0.56984  | 1.777051 | 1.067082 |
|       | G-TPP     | WEHI-539 | ABT199   | A1210477 |          |          |          |
| GBM6  | 2.5 μM    | 1.232895 | 1.287671 | 1.09589  | 1.219178 | 1.199229 | 1.217096 |
|       | 1.25 μM   | 1.116279 | 1.232558 | 1.090909 | 1.125931 | 1.595238 | 1.202673 |
|       | 0.625 μM  | 1.461538 | 1.384615 | 1.181818 | 1.179345 | 1.62069  | 1.382488 |
|       | 0.3125 μM | 4.060914 | 3        | 1.416667 | 2.166667 | 13.67032 | 3.895598 |
|       | G-TPP     | WEHI-539 | ABT199   | A1210477 |          |          |          |

 Synergism  
 Additivity  
 Antagonism
